# Supplementary material for: Prevalence of Asthma and Its Associating Environmental Factors among 6–12-Year-Old Schoolchildren in a Metropolitan Environment—A Cross-Sectional, Questionnaire-Based Study
Source: MDPI journal article supplement (doi:10.3390/ijerph182413403), 2021-12-20
Supplement: s1 [file s1]

**Table S1:** Dataset of environmental risk factor analysis

| QID | Environmental factor                                            |               | n (%) in CA | p-values | OR   | CI           |
|-----|-----------------------------------------------------------------|---------------|-------------|----------|------|--------------|
| E1  | Location of residence in the suburbs<br>(according to ZIPcodes) | Yes (n= 346)  | 30 (8.67)   | 0.0236   | 0.64 | 0.43 – 0.93  |
|     |                                                                 | No (n= 3464)  | 448 (12.93) |          |      |              |
| E2  | Living in a house with prefabricated<br>concrete walls          | Yes (n= 1013) | 135 (13.33) | 0.4282   | 1.09 | 0.88 - 1.35  |
|     |                                                                 | No (n= 2823)  | 349 (12.36) |          |      |              |
| E3  | Living in a house with brick walls                              | Yes (n= 1579) | 191 (12.10) | 0.4165   | 0.92 | 0.76 - 1.12  |
|     |                                                                 | No (n= 2257)  | 293 (12.98) |          |      |              |
| E4  | Living in a detached house<br>surrounded by a garden            | Yes (n= 1570) | 191 (12.17) | 0.4833   | 0.93 | 0.77 - 1.13  |
|     |                                                                 | No (n= 2266)  | 293 (12.93) |          |      |              |
| E5  | Living in a log cabin                                           | Yes (n= 6)    | 2 (33.33)   | 0.1514   | 3.47 | 0.48 - 17.85 |
|     |                                                                 | No (n= 3830)  | 482 (12.58) |          |      |              |
| E6  | Wall-to-wall carpet in the bedroom                              | Yes (n= 611)  | 88 (14.40)  | 0.1479   | 1.20 | 0.93 - 1.53  |
|     |                                                                 | No (n= 3225)  | 396 (12.28) |          |      |              |
| E7  | Linoleum in the bedroom                                         | Yes (n= 76)   | 13 (17.11)  | 0.2367   | 1.44 | 0.75 - 2.55  |
|     |                                                                 | No (n= 3760)  | 471 (12.53) |          |      |              |
| E8  | Parquet in the bedroom                                          | Yes (n= 3374) | 426 (12.63) | 0.9652   | 1.01 | 0.76 - 1.36  |
|     |                                                                 | No (n= 462)   | 58 (12.55)  |          |      |              |
| E9  | Tapestry in the bedroom                                         | Yes (n= 183)  | 24 (13.11)  | 0.8355   | 1.05 | 0.66 - 1.60  |
|     |                                                                 | No (n= 3653)  | 460 (12.59) |          |      |              |
| E10 | Visible mould in the bedroom                                    | Yes (n= 122)  | 28 (22.95)  | 0.0006   | 2.13 | 1.36 – 3.24  |
|     |                                                                 | No (n= 3714)  | 456 (12.28) |          |      |              |
| E11 | Plant in the bedroom                                            | Yes (n= 1543) | 171 (11.08) | 0.0191   | 0.79 | 0.65 – 0.96  |
|     |                                                                 | No (n= 2293)  | 313 (13.65) |          |      |              |
| E12 | Feather bedding when sleeping                                   | Yes (n= 546)  | 64 (11.72)  | 0.4964   | 0.91 | 0.68 – 1.19  |
|     |                                                                 | No (n= 3290)  | 420 (12.77) |          |      |              |
| E13 | Heating with wood or coal burning<br>stove                      | Yes (n= 97)   | 8 (8.25)    | 0.1935   | 0.62 | 0.27 - 1.20  |
|     |                                                                 | No (n= 3739)  | 476 (12.73) |          |      |              |
| E14 | Heating with fuel oil stove                                     | Yes (n= 17)   | 3 (17.65)   | 0.5342   | 1.49 | 0.34 - 4.58  |
|     |                                                                 | No (n= 3819)  | 481 (12.59) |          |      |              |
| E15 | Central heating                                                 | Yes (n= 3274) | 418 (12.77) | 0.4999   | 1.10 | 0.84 - 1.46  |
|     |                                                                 | No (n= 562)   | 66 (11.74)  |          |      |              |

|     |                                                                                   |               |             |        |      |             |
|-----|-----------------------------------------------------------------------------------|---------------|-------------|--------|------|-------------|
| E16 | Heating with wood or coal burning stove during the first year of the child's life | Yes (n= 120)  | 20 (16.67)  | 0.1768 | 1.40 | 0.84 - 2.24 |
|     |                                                                                   | No (n= 3716)  | 464 (12.49) |        |      |             |
| E17 | Heating with fuel oil stove during the first year of the child's life             | Yes (n= 16)   | 2 (12.50)   | 0.9887 | 0.99 | 0.15 - 3.56 |
|     |                                                                                   | No (n= 3820)  | 482 (12.62) |        |      |             |
| E18 | Central heating during the first year of the child's life                         | Yes (n= 3282) | 414 (12.61) | 0.9890 | 0.10 | 0.77 - 1.32 |
|     |                                                                                   | No (n= 554)   | 70 (12.64)  |        |      |             |
| E19 | Frequent use of an air conditioner (1 – 2 hours / day)                            | Yes (n= 854)  | 105 (12.30) | 0.7478 | 0.96 | 0.76 - 1.21 |
|     |                                                                                   | No (n= 2982)  | 379 (12.71) |        |      |             |
| E20 | Heavy-vehicle traffic frequent or constant (in 500 m)                             | Yes (n= 2483) | 337 (13.57) | 0.0161 | 1.29 | 1.05- 1.59  |
|     |                                                                                   | No (n= 1353)  | 147 (10.86) |        |      |             |
| E21 | Living in a weedy area (in 500 m)                                                 | Yes (n= 1666) | 245 (14.71) | 0.0007 | 1.39 | 1.15 - 1.69 |
|     |                                                                                   | No (n= 2170)  | 239 (11.01) |        |      |             |
| E22 | Living not far from an air-polluting factory or mine (in 1 km)                    | Yes (n= 689)  | 106 (15.38) | 0.0161 | 1.33 | 1.05 - 1.68 |
|     |                                                                                   | No (n= 3147)  | 378 (12.01) |        |      |             |
| E23 | Keeping furry animals or birds at home                                            | Yes (n= 1373) | 178 (12.96) | 0.6291 | 1.05 | 0.86 – 1.28 |
|     |                                                                                   | No (n= 2463)  | 306 (12.42) |        |      |             |
| E24 | Dogs at home                                                                      | Yes (n= 621)  | 101 (16.26) | 0.0029 | 1.44 | 1.13 – 1.82 |
|     |                                                                                   | No (n= 3215)  | 383 (11.91) |        |      |             |
| E25 | Cats at home                                                                      | Yes (n= 416)  | 48 (11.54)  | 0.4831 | 0.89 | 0.64 – 1.21 |
|     |                                                                                   | No (n= 3420)  | 436 (12.75) |        |      |             |
| E26 | Rodents at home                                                                   | Yes (n= 481)  | 47 (9.77)   | 0.0454 | 0.72 | 0.52 – 0.98 |
|     |                                                                                   | No (n= 3355)  | 437 (13.03) |        |      |             |
| E27 | Birds at home                                                                     | Yes (n= 111)  | 15 (13.51)  | 0.7730 | 1.08 | 0.60 – 1.83 |
|     |                                                                                   | No (n= 3725)  | 469 (12.59) |        |      |             |
| E28 | Furry animals or birds at home in the first year of the child's life              | Yes (n= 683)  | 94 (13.76)  | 0.3204 | 1.13 | 0.88 – 1.43 |
|     |                                                                                   | No (n= 3153)  | 390 (12.37) |        |      |             |
| E29 | Dogs at home in the first year of the child's life                                | Yes (n= 429)  | 61 (14.22)  | 0.2897 | 1.17 | 0.87 – 1.55 |
|     |                                                                                   | No (n= 3407)  | 423 (12.42) |        |      |             |
| E30 | Cats at home in the first year of the child's life                                | Yes (n= 240)  | 33 (13.75)  | 0.5855 | 1.11 | 0.75 - 1.60 |
|     |                                                                                   | No (n= 3596)  | 451 (12.54) |        |      |             |
| E31 | Rodents at home in the first year of the child's life                             | Yes (n= 117)  | 15 (12.82)  | 0.9464 | 1.02 | 0.56 – 1.71 |
|     |                                                                                   | No (n= 3719)  | 469 (12.61) |        |      |             |

|     |                                                       |              |             |        |      |             |
|-----|-------------------------------------------------------|--------------|-------------|--------|------|-------------|
| E32 | Birds at home in the first year of the child's life   | Yes (n= 42)  | 9 (21.43)   | 0.0892 | 1.91 | 0.85 – 3.84 |
|     |                                                       | No (n= 3794) | 475 (12.52) |        |      |             |
| E33 | Smoking at home in the first year of the child's life | Yes (n= 325) | 59 (18.15)  | 0.0018 | 1.61 | 1.18 – 2.16 |
|     |                                                       | No (n= 3511) | 425 (12.10) |        |      |             |
| E34 | Smoking at home                                       | Yes (n= 370) | 68 (18.38)  | 0.0005 | 1.65 | 1.24 – 2.18 |
|     |                                                       | No (n= 3466) | 416 (12.00) |        |      |             |

QID: question ID, CA: cumulative asthma, OR: odds ratio, CI: confidence interval.
