# Supplementary material for: Prevalence of Asthma and Its Associating Environmental Factors among 6–12-Year-Old Schoolchildren in a Metropolitan Environment—A Cross-Sectional, Questionnaire-Based Study
Source: MDPI journal article supplement (doi:10.3390/ijerph182413403), 2021-12-20
Supplement: s1 [file s1]

**Table S2:** Dataset of nutritional risk factor analysis

| QID  | Nutritional factors:<br>Weekly frequency of<br>ingredient consumption<br>during the last 12 months |                                 | n (%)<br>in CA | P-<br>values | OR   | CI          |
|------|----------------------------------------------------------------------------------------------------|---------------------------------|----------------|--------------|------|-------------|
| N1d  | Meat                                                                                               | Frequently [≥1 times] (n= 3772) | 474<br>(12.57) | 0.7988       | 1.11 | 0.55 - 2.69 |
|      |                                                                                                    | Rarely [<1 time] (n= 61)        | 7<br>(11.48)   |              |      |             |
|      |                                                                                                    | None responders (n= 3)          | 3<br>(100.00)  |              |      |             |
| N2d  | Fish or seafood                                                                                    | Frequently [≥1 times] (n= 1583) | 209<br>(13.20) | 0.3603       | 1.09 | 0.90 - 1.33 |
|      |                                                                                                    | Rarely [≤2 times] (n= 2253)     | 275<br>(12.21) |              |      |             |
| N3d  | Fresh fruit                                                                                        | Frequently [≥1 time] (n= 3696)  | 467<br>(12.64) | 0.8633       | 1.05 | 0.64 - 1.82 |
|      |                                                                                                    | Rarely [<1 time] (n= 140)       | 17<br>(12.14)  |              |      |             |
| N4d  | Fresh vegetables                                                                                   | Frequently [≥1 time] (n= 3489)  | 437<br>(12.53) | 0.5856       | 0.91 | 0.67 - 1.28 |
|      |                                                                                                    | Rarely [<1 time] (n= 347)       | 47<br>(13.54)  |              |      |             |
| N5d  | Legumes (e.g. bean, pea, lentils)                                                                  | Frequently [≥1 time] (n= 2681)  | 338<br>(12.61) | 0.9772       | 0.10 | 0.81 - 1.23 |
|      |                                                                                                    | Rarely [<1 time] (n= 1155)      | 146<br>(12.64) |              |      |             |
| N6d  | Cereals (e.g. wheat, rye)                                                                          | Frequently [≥1 time] (n= 3517)  | 420<br>(11.94) | 0.0000       | 0.54 | 0.41 - 0.73 |
|      |                                                                                                    | Rarely [<1 time] (n= 319)       | 64<br>(20.06)  |              |      |             |
| N7d  | Pasta                                                                                              | Frequently [≥1 time] (n= 3722)  | 475<br>(12.76) | 0.1275       | 1.71 | 0.91 - 3.65 |
|      |                                                                                                    | Rarely [<1 time] (n= 114)       | 9 (7.89)       |              |      |             |
| N8d  | Rice                                                                                               | Frequently [≥1 time] (n= 3539)  | 450<br>(12.72) | 0.5278       | 1.13 | 0.79 - 1.66 |
|      |                                                                                                    | Rarely [<1 time] (n= 297)       | 34<br>(11.45)  |              |      |             |
| N9d  | Butter                                                                                             | Frequently [≥1 time] (n= 3053)  | 393<br>(12.87) | 0.3475       | 1.12 | 0.89 - 1.44 |
|      |                                                                                                    | Rarely [<1 time] (n= 783)       | 91<br>(11.62)  |              |      |             |
| N10d | Margarine                                                                                          | Frequently [≥1 time] (n= 2214)  | 310<br>(14.00) | 0.0026       | 1.35 | 1.11 - 1.65 |
|      |                                                                                                    | Rarely [<1 time] (n= 1622)      | 174<br>(10.73) |              |      |             |
| N11d | Nuts (e.g. chestnut, peanut, almond)                                                               | Frequently [≥1 time] (n= 2088)  | 247<br>(11.83) | 0.1087       | 0.86 | 0.71 - 1.04 |
|      |                                                                                                    | Rarely [<1 time] (n= 1748)      | 237<br>(13.56) |              |      |             |

| QID  | Nutritional factors:                                                       |                                                                           | n (%)<br>in CA | p-<br>values | OR   | CI          |
|------|----------------------------------------------------------------------------|---------------------------------------------------------------------------|----------------|--------------|------|-------------|
|      | Weekly frequency of<br>ingredient consumption<br>during the last 12 months |                                                                           |                |              |      |             |
| N12d | Potatoe                                                                    | Frequently [≥1 time] (n= 3584)                                            | 456<br>(12.72) | 0.4569       | 1.17 | 0.79 - 1.78 |
|      |                                                                            | Rarely [ <lt;1 (n="252)&lt;/td" time]=""><td>28<br/>(11.11)</td></lt;1>   | 28<br>(11.11)  |              |      |             |
| N13d | Milk or dairy products                                                     | Frequently [≥1 time] (n= 3328)                                            | 417<br>(12.53) | 0.6771       | 0.94 | 0.72 - 1.25 |
|      |                                                                            | Rarely [ <lt;1 (n="508)&lt;/td" time]=""><td>67<br/>(13.19)</td></lt;1>   | 67<br>(13.19)  |              |      |             |
| N14d | Egg                                                                        | Frequently [≥1 time] (n= 3324)                                            | 415<br>(12.48) | 0.5296       | 0.92 | 0.70 - 1.21 |
|      |                                                                            | Rarely [ <lt;1 (n="512)&lt;/td" time]=""><td>69<br/>(13.48)</td></lt;1>   | 69<br>(13.48)  |              |      |             |
| N15d | Fast food (e.g. hamburger)                                                 | Frequently [≥1 time] (n= 622)                                             | 115<br>(18.49) | 0.0000       | 1.75 | 1.39 - 2.19 |
|      |                                                                            | Rarely [ <lt;1 (n="3214)&lt;/td" time]=""><td>369<br/>(11.48)</td></lt;1> | 369<br>(11.48) |              |      |             |
| N16d | Soft drinks or juices containing<br>colorants or preservatives             | Frequently [≥1 time] (n= 1550)                                            | 220<br>(14.19) | 0.0157       | 1.27 | 1.05 - 1.53 |
|      |                                                                            | Rarely [ <lt;1 (n="2286)&lt;/td" time]=""><td>264<br/>(11.55)</td></lt;1> | 264<br>(11.55) |              |      |             |

QID: question ID, CA: cumulative asthma, OR: odds ratio, CI: confidence interval.
