# Supplementary material for: Prevalence of Asthma and Its Associating Environmental Factors among 6–12-Year-Old Schoolchildren in a Metropolitan Environment—A Cross-Sectional, Questionnaire-Based Study
Source: MDPI journal article supplement (doi:10.3390/ijerph182413403), 2021-12-20
Supplement: s1 [file s1]

**Table S3:** Dataset of cumulative asthma prevalence in BMI-for-age percentile ranges

| <b>BMI-for-age percentile</b> | <b>00 - 03</b> | <b>03 - 10</b> | <b>10 - 75</b>  | <b>75 - 90</b> | <b>90 - 97</b> | <b>97 – 100</b> |
|-------------------------------|----------------|----------------|-----------------|----------------|----------------|-----------------|
| Cumulative asthma (n= 401)    | 28<br>(9.40%)  | 40<br>(11.08%) | 212<br>(11.53%) | 68<br>(13.77%) | 32<br>(15.09%) | 21<br>(23.08%)  |
| Non-asthmatic (n= 2894)       | 270            | 321            | 1627            | 426            | 180            | 70              |

Chi-square= 16.26 df= 5 p= 0.0062
